# Supplementary material for: Common Genetic Variants near the Brittle Cornea Syndrome Locus ZNF469 Influence the Blinding Disease Risk Factor Central Corneal Thickness
Source: PubMed Central journal article supplement (PMC2869325; doi:10.1371/journal.pgen.1000947), 2010-05-13
Supplement: pgen.1000947.s010.pdf [file pgen.1000947.s010.pdf]

**Table S1. Summary of the sample sizes of the study populations.**

| Study population                               | Quantitative trait analysis | Case-control analysis |                     |
|------------------------------------------------|-----------------------------|-----------------------|---------------------|
|                                                | Total sample size           | Case (lower 20%)      | Control (upper 20%) |
| AU twin (T1) <sup>a</sup>                      | 1714                        |                       |                     |
| UK twin (T2)                                   | 1759                        |                       |                     |
| BMES population (P1)                           |                             | 143                   | 146                 |
| Adelaide population (P2)                       |                             | 106                   | 105                 |
| Additional AU population (P3) <sup>b</sup>     |                             | 52                    | 50                  |
| Extended AU population (P1+P2+P3) <sup>c</sup> | 587                         |                       |                     |

a: Australian twin cohort (T1) is a combined cohort of two sub-samples, 953 individuals from the Brisbane Adolescent Twin Study (BATS) and 761 individuals from the Twin Eye Study in Tasmania (TEST).

b: The additional AU population contains 102 extra samples: 72 samples from BMES population but not included in the DNA pools and 30 samples from Adelaide population but not included in the blood pools.

c: The extended AU population mainly consists of the BMES population (P1), Adelaide population (P2) and the extra samples from these two populations (P3). However, due to insufficient DNA stocks being available for some samples, 15 samples from the BMES population were included in the DNA pools but not individually genotyped.
