# Supplementary material for: Common Genetic Variants near the Brittle Cornea Syndrome Locus ZNF469 Influence the Blinding Disease Risk Factor Central Corneal Thickness
Source: PubMed Central journal article supplement (PMC2869325; doi:10.1371/journal.pgen.1000947), 2010-05-13
Supplement: pgen.1000947.s011.pdf [file pgen.1000947.s011.pdf]

**Table S2. Top genotyped variants from the association test based on meta-analysis of two twin samples and two pooled samples.**

| Name       | Chr | BP        | gene        | Alleles | AU twin sample  |         | UK twin sample  |         | DNA Pool sample |         | Blood Pool sample |      | Meta of all samples |         |
|------------|-----|-----------|-------------|---------|-----------------|---------|-----------------|---------|-----------------|---------|-------------------|------|---------------------|---------|
|            |     |           |             |         | Effect (sd)     | pval    | Effect (sd)     | pval    | Effect (sd)     | pval    | Effect (sd)       | pval | Effect (sd)         | pval    |
| rs2755237  | 13  | 40007429  | FOXO1       | A/C     | 0.20<br>(0.06)  | 3.2E-04 | 0.24<br>(0.06)  | 1.3E-04 | 0.18<br>(0.12)  | 0.12    | 0.15<br>(0.12)    | 0.23 | 0.21<br>(0.04)      | 2.5E-08 |
| rs12447690 | 16  | 86855625  | ZNF469      | T/C     | 0.12<br>(0.04)  | 3.7E-03 | 0.21<br>(0.04)  | 2.9E-08 | 0.05<br>(0.07)  | 0.52    | -0.01<br>(0.08)   | 0.92 | 0.14<br>(0.02)      | 4.1E-08 |
| rs2721051  | 13  | 40008884  | FOXO1       | A/G     | -0.25<br>(0.07) | 1.3E-04 | -0.20<br>(0.06) | 9.9E-04 | -0.23<br>(0.16) | 0.16    | -0.15<br>(0.18)   | 0.40 | -0.22<br>(0.04)     | 1.3E-07 |
| rs7643363  | 3   | 173398470 | FNDC3B      | T/C     | -0.14<br>(0.06) | 1.3E-02 | -0.30<br>(0.07) | 9.7E-06 | -0.14<br>(0.13) | 0.27    | -0.26<br>(0.12)   | 0.03 | -0.21<br>(0.04)     | 1.4E-07 |
| rs6990252  | 8   | 39935625  | INDOL1      | A/G     | 0.14<br>(0.05)  | 5.4E-03 | 0.19<br>(0.05)  | 1.6E-05 | 0.09<br>(0.09)  | 0.37    | 0.09<br>(0.11)    | 0.41 | 0.15<br>(0.03)      | 3.7E-07 |
| rs11245330 | 10  | 126370328 | FAM53B      | A/G     | 0.22<br>(0.06)  | 2.9E-04 | 0.23<br>(0.06)  | 4.0E-05 | 0.18<br>(0.14)  | 0.18    | -0.23<br>(0.15)   | 0.12 | 0.19<br>(0.04)      | 4.6E-07 |
| rs1006368  | 10  | 126336593 | FAM53B      | A/G     | 0.22<br>(0.06)  | 2.8E-04 | 0.23<br>(0.06)  | 4.2E-05 | 0.17<br>(0.13)  | 0.21    | -0.21<br>(0.15)   | 0.15 | 0.19<br>(0.04)      | 5.0E-07 |
| rs9938149  | 16  | 86889141  | ZNF469      | A/C     | 0.13<br>(0.04)  | 2.6E-03 | 0.21<br>(0.05)  | 5.3E-06 | 0.08<br>(0.07)  | 0.28    | 0.01<br>(0.08)    | 0.93 | 0.13<br>(0.03)      | 5.2E-07 |
| rs10901827 | 10  | 126495959 | FAM175B     | T/G     | -0.20<br>(0.06) | 7.6E-04 | -0.22<br>(0.06) | 7.1E-05 | -0.31<br>(0.15) | 0.04    | 0.34<br>(0.16)    | 0.04 | -0.19<br>(0.04)     | 7.7E-07 |
| rs1034200  | 13  | 22126691  | FTHL7       | T/G     | 0.20<br>(0.04)  | 4.5E-06 | 0.07<br>(0.05)  | 1.5E-01 | 0.15<br>(0.08)  | 0.06    | NA                | NA   | 0.14<br>(0.03)      | 1.6E-06 |
| rs4894535  | 3   | 173478299 | FNDC3B      | T/C     | -0.19<br>(0.05) | 4.3E-04 | -0.16<br>(0.05) | 1.1E-03 | -0.13<br>(0.12) | 0.31    | -0.01<br>(0.13)   | 0.94 | -0.16<br>(0.03)     | 2.2E-06 |
| rs9965653  | 18  | 56553865  | hCG_1659830 | T/C     | -0.12<br>(0.04) | 2.4E-03 | -0.09<br>(0.04) | 3.8E-02 | -0.28<br>(0.07) | 2.2E-05 | 0.01<br>(0.07)    | 0.92 | -0.12<br>(0.03)     | 2.4E-06 |
| rs11750296 | 5   | 141916656 | FGF1        | A/G     | -0.11<br>(0.05) | 4.1E-02 | -0.17<br>(0.06) | 4.6E-03 | -0.29<br>(0.11) | 0.01    | -0.29<br>(0.11)   | 0.01 | -0.17<br>(0.04)     | 2.6E-06 |
| rs6496932  | 15  | 83626571  | LOC642935   | A/C     | -0.17<br>(0.05) | 6.8E-04 | -0.13<br>(0.05) | 5.4E-03 | -0.12<br>(0.10) | 0.22    | -0.12<br>(0.10)   | 0.25 | -0.14<br>(0.03)     | 3.5E-06 |

|            |    |           |           |     |                 |         |                 |         |                 |         |                 |      |                 |         |
|------------|----|-----------|-----------|-----|-----------------|---------|-----------------|---------|-----------------|---------|-----------------|------|-----------------|---------|
| rs2721043  | 13 | 39976668  | LOC646982 | T/G | -0.26<br>(0.07) | 1.8E-04 | -0.16<br>(0.08) | 3.9E-02 | -0.26<br>(0.17) | 0.13    | -0.24<br>(0.19) | 0.22 | -0.22<br>(0.05) | 4.3E-06 |
| rs2334946  | 13 | 22126060  | FTHL7     | T/C | -0.20<br>(0.04) | 4.6E-06 | -0.07<br>(0.05) | 1.3E-01 | -0.14<br>(0.08) | 0.06    | 0.01<br>(0.08)  | 0.95 | -0.13<br>(0.03) | 5.3E-06 |
| rs1548210  | 7  | 3493211   | SDK1      | T/C | -0.11<br>(0.04) | 4.6E-03 | -0.13<br>(0.04) | 2.3E-04 | -0.05<br>(0.07) | 0.45    | -0.03<br>(0.07) | 0.71 | -0.10<br>(0.02) | 6.3E-06 |
| rs33962    | 5  | 141909735 | FGF1      | A/G | 0.08<br>(0.05)  | 8.9E-02 | 0.12<br>(0.05)  | 2.6E-02 | 0.28<br>(0.08)  | 7.8E-04 | 0.23<br>(0.09)  | 0.01 | 0.14<br>(0.03)  | 7.1E-06 |
| rs11875795 | 18 | 42767069  | KATNAL2   | A/G | -0.25<br>(0.07) | 5.2E-04 | -0.12<br>(0.06) | 4.8E-02 | -0.55<br>(0.17) | 1.5E-03 | NA              | NA   | -0.20<br>(0.05) | 8.2E-06 |
| rs7204132  | 16 | 86902018  | ZNF469    | T/G | -0.09<br>(0.04) | 2.5E-02 | -0.18<br>(0.04) | 5.4E-06 | -0.05<br>(0.17) | 0.55    | 0.03<br>(0.08)  | 0.76 | -0.11<br>(0.03) | 8.3E-06 |
| rs7236403  | 18 | 42676659  | PIAS2     | T/C | 0.25<br>(0.07)  | 6.4E-04 | 0.10<br>(0.07)  | 1.2E-01 | 0.45<br>(0.18)  | 0.01    | 0.43<br>(0.18)  | 0.02 | 0.20<br>(0.05)  | 8.6E-06 |
| rs17138064 | 17 | 32263204  | LOC727853 | A/G | 0.18<br>(0.07)  | 1.0E-02 | 0.28<br>(0.09)  | 1.0E-03 | 0.29<br>(0.17)  | 0.09    | 0.14<br>(0.19)  | 0.46 | 0.22<br>(0.05)  | 8.8E-06 |
| rs7044529  | 9  | 136707872 | COL5A1    | T/C | -0.11<br>(0.06) | 5.3E-02 | -0.17<br>(0.05) | 9.6E-04 | -0.14<br>(0.12) | 0.24    | -0.30<br>(0.12) | 0.02 | -0.15<br>(0.03) | 9.3E-06 |
